# Supplementary material
Source: PubMed Central journal article supplement (PMC6277538)
Supplement: mmc1.pdf [file mmc1.pdf]

YMTHE, Volume 26

## **Supplemental Information**

### **Deamidation of Amino Acids on the Surface of Adeno-Associated Virus Capsids Leads to Charge Heterogeneity and Altered Vector Function**

**April R. Giles, Joshua J. Sims, Kevin B. Turner, Lakshmanan Govindasamy, Mauricio R. Alvira, Martin Lock, and James M. Wilson**

## Supplemental Data

Figure S1. Determination of factors influencing AAV8 capsid deamidation

A.

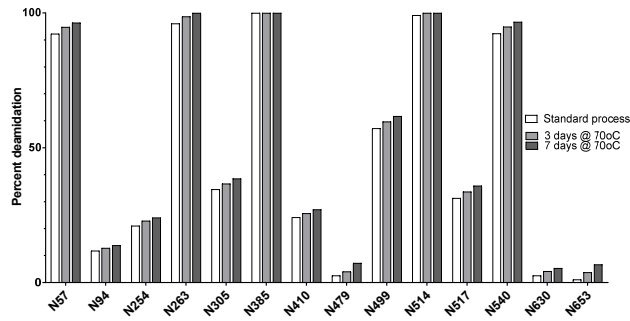

B.

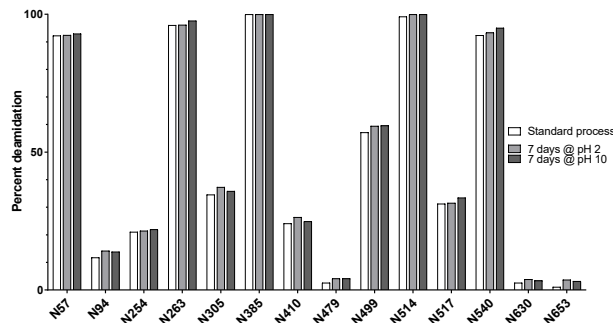

C.

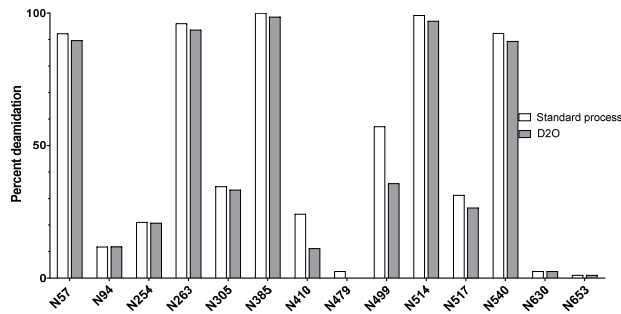

D.

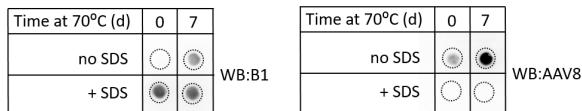

**Figure S1. Determination of factors influencing AAV8 capsid deamidation.** An AAV8 prep was (A) incubated at 70°C for three or seven days, (B) exposed to pH 2 or pH 10 for seven days, or (C) prepared for mass spectrometry using D<sub>2</sub>O in place of H<sub>2</sub>O to determine possible sources of deamidation not intrinsic to AAV capsid formation. (D) A dot blot of vector treated as in (A) using the B1 antibody (reacts to denatured capsid) and an AAV8 conformation specific antibody (reacts to intact capsids) to assess capsid structural integrity.

Figure S2. Deamidation frequencies in non-AAV proteins

A.

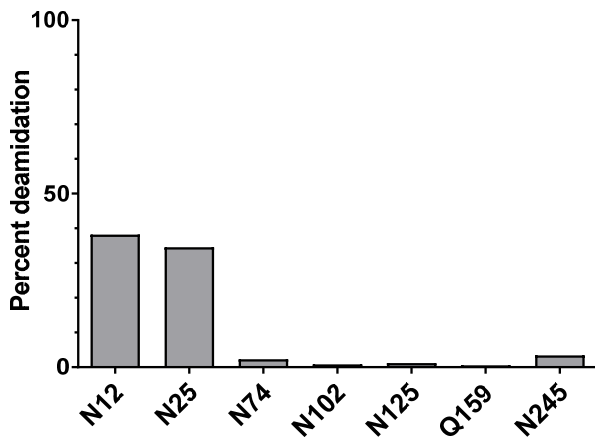

B.

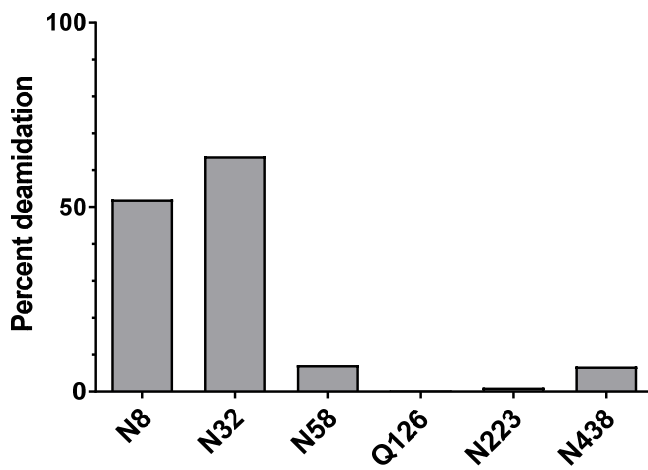

**Figure S2. Deamidation frequencies in non-AAV proteins.** Deamidation percentages are shown for two non-AAV recombinant proteins containing NG motifs likely to be deamidated, human carbonic anhydrase (A) and rat phenylalanine-hydroxylase (B), for comparison with AAV deamidation percentages.

Figure S3. Comparison of AAV8 percent deamidation calculated using data analysis pipelines from 2 institutions

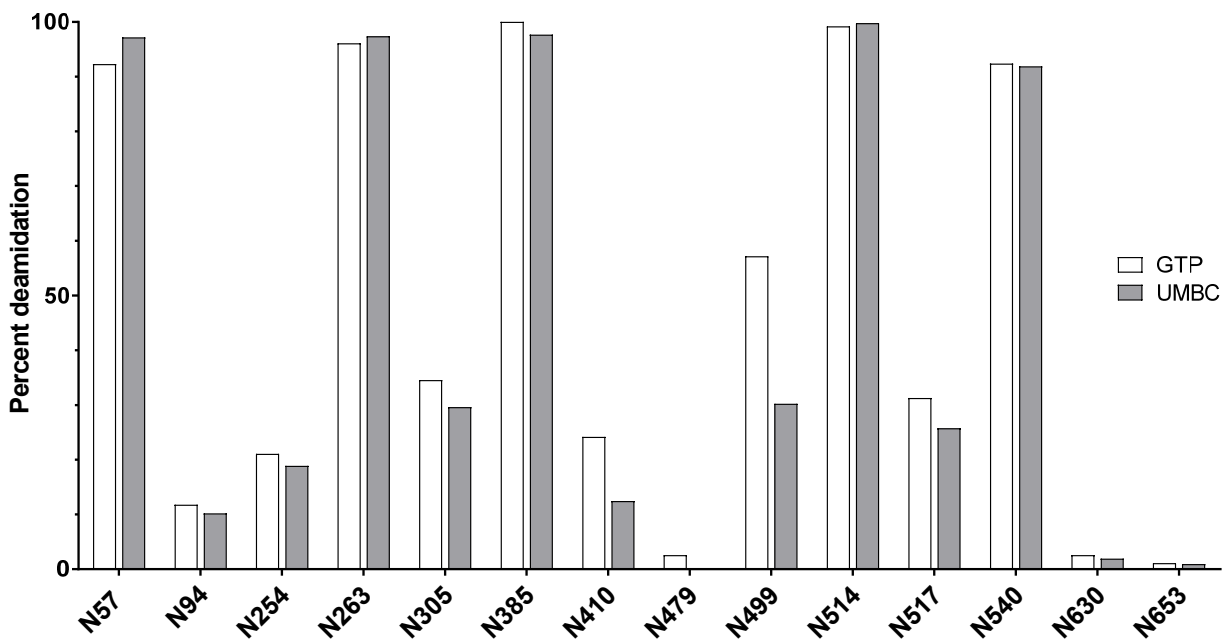

**Figure S3. Comparison of AAV8 percent deamidation calculated using data analysis pipelines from two institutions.** Percent deamidation at specific asparagine and glutamine residues of interest are shown for AAV8 tryptic peptides evaluated at two different institutions.

Figure S4. Analysis of asparagine and glutamine deamidation in AAV9 capsid proteins

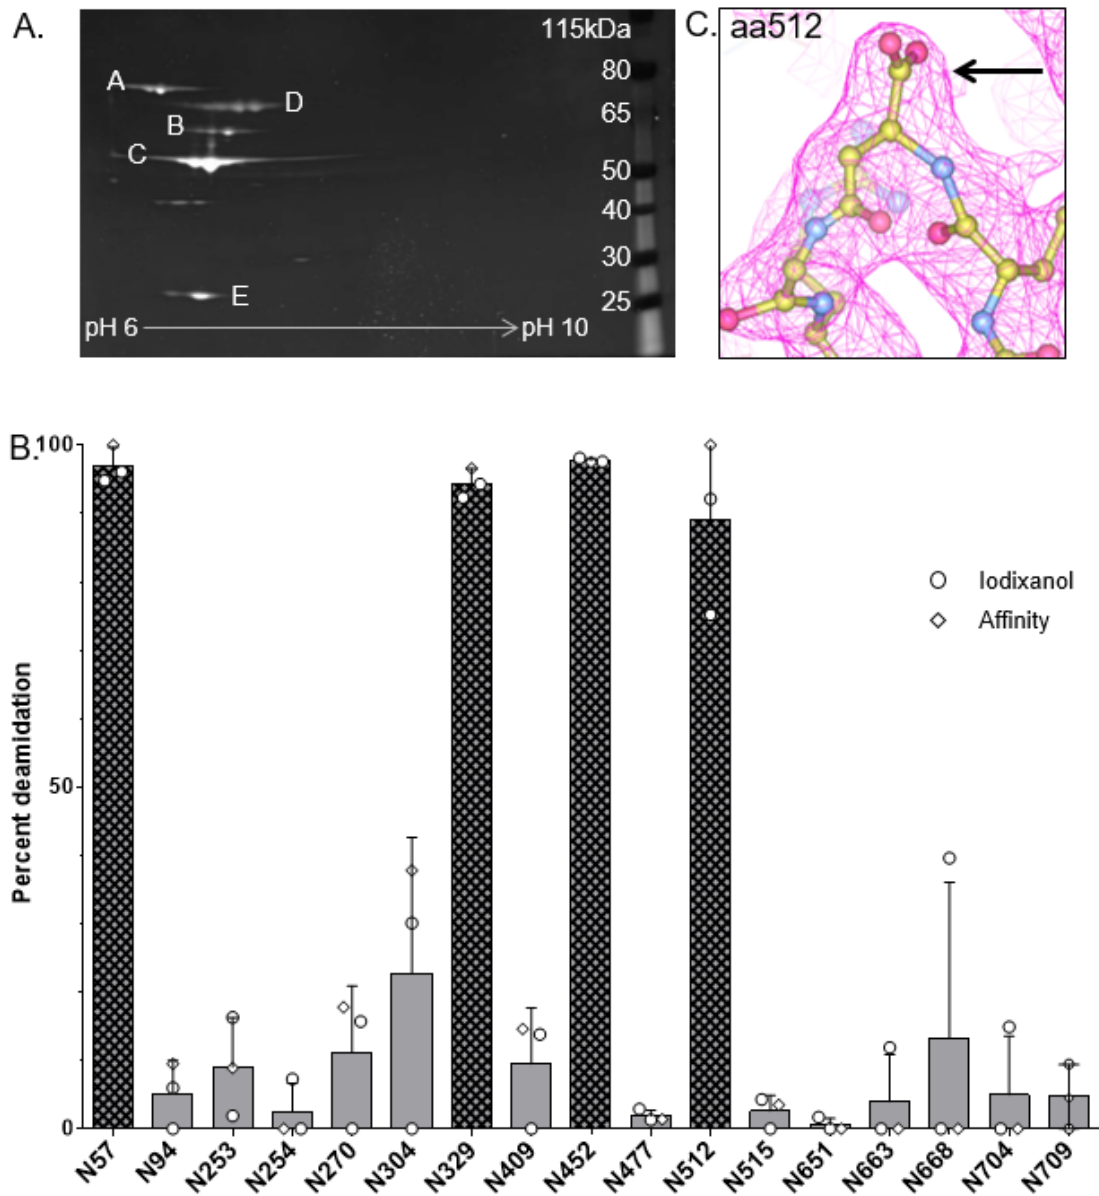

**Figure S4. Analysis of asparagine and glutamine deamidation in AAV9 capsid proteins.** (A) 1e11 GCs of wtAAV9 were analyzed by 2D gel electrophoresis and stained with Sypro Ruby. Protein labeling: A=VP1; B=VP2; C=VP3, D=chicken egg white conalbumin marker, E=turbonuclease marker. Isoelectric focusing was performed with a pI range of 6-10. (B) Percent deamidation at specific asparagine and glutamine residues of interest are shown for AAV9 tryptic peptides purified by different methods. Bars indicating deamidation at asparagine residues with N+1 glycines are crosshatched. Residues determined to be at least 2% deamidated in at least one prep analyzed were included. Data are represented as mean  $\pm$  standard deviation. (C) Isoaspartic model of N512 is shown in the 2FoFc electron density map generated by non-biased refinement of the AAV9 crystal structure (PDB ID: 3UX1). Arrow indicates electron density corresponding to the R group of residue N512.

Figure S5. Determination of factors influencing AAV9 capsid deamidation

A.

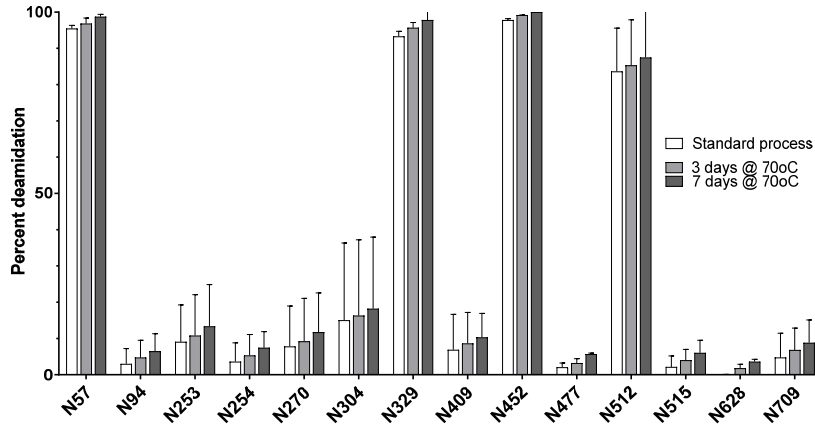

B.

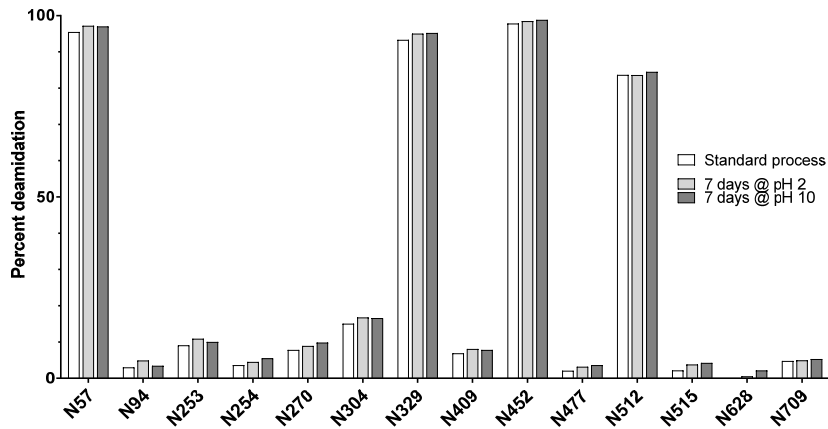

C.

| Serotype | AAV9             |   | WB:B1 |   |
|----------|------------------|---|-------|---|
|          | Time at 70°C (d) | 0 |       | 7 |
| no SDS   | 0                | ○ | ○     |   |
|          | 7                | ○ | ○     |   |
| + SDS    | 0                | ● | ●     |   |
|          | 7                | ● | ●     |   |

**Figure S5. Determination of factors influencing AAV9 capsid deamidation.** Two AAV9 preps were (A) incubated at 70°C for three or seven days or (B) exposed to pH 2 or pH 10 for seven days to determine possible sources of deamidation not intrinsic to AAV capsid formation. Data are represented as mean  $\pm$  standard deviation. (C) A dot blot of vector treated as in (A) using the B1 antibody (reacts to denatured capsid) to assess capsid structural integrity.

Figure S6. The impact of genetic deamidation on AAV9 vector performance

A.

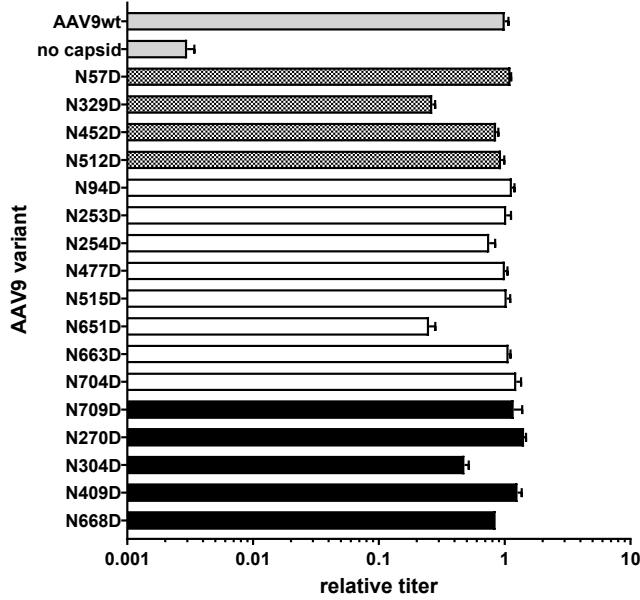

B.

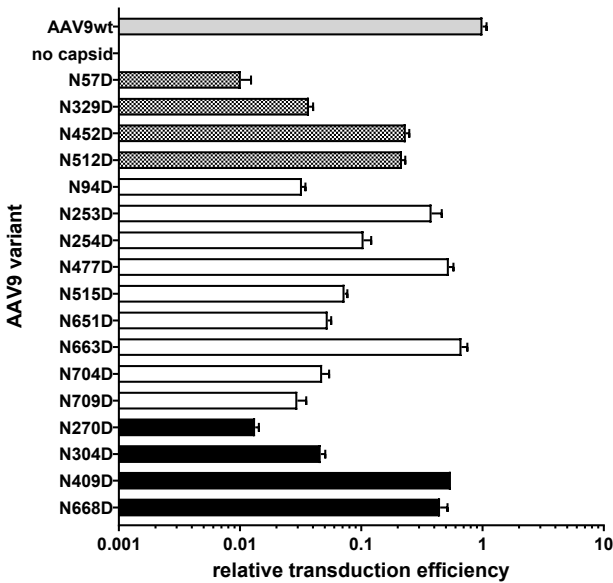

**Figure S6. *In vitro* analysis of the impact of genetic deamidation on vector performance.** (A) Titers of wtAAV9 and genetic deamidation mutant vectors were produced by small-scale triple transfection in 293 cells, as measured by quantitative PCR (qPCR). Titers are reported relative to the wtAAV9 control. NG sites with high deamidation (patterned bars), sites with low deamidation (white bars) and highly variable sites (black bars) are presented with wtAAV8 and a negative control. (B) The transduction efficiency of mutant AAV9 vectors producing firefly luciferase are reported relative to the wtAAV9 control. All data are represented as mean  $\pm$  standard deviation.

Figure S7. AAV9 vector *in vitro* potency through time

A.

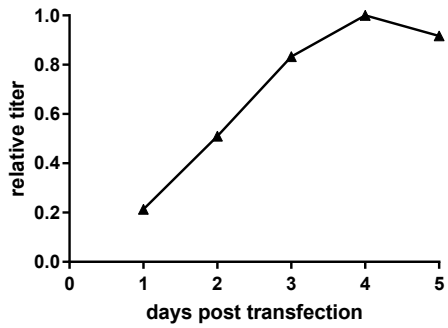

B.

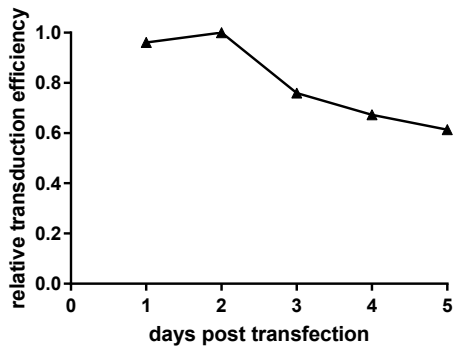

C.

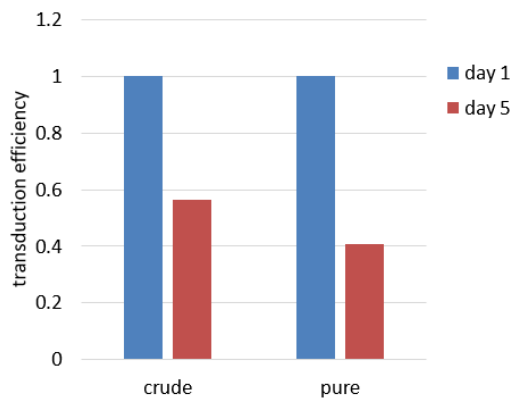

**Figure S7. AAV9 vector *in vitro* potency through time.** Vector production (DNaseI resistant Genome Copies, GC) for a timecourse of triple-transfected HEK 293 cells producing AAV9 vector packaging a luciferase reporter gene. GC levels are normalized to the maximum observed value. (B) Crude timecourse vector was used to transduce Huh7 cells. (C) Transduction efficiencies of vector collected 1 day post transfection vs. 5 days post transfection are shown for crude and purified vector samples. Transduction efficiency is expressed as luciferase activity/GC, normalized to the value at day 1.



Table S1. Characteristics of AAV9 deamidated residues of interest

|      | N+1 residue | Structural topology | Structural motif | Average % deamidation | Temperature factor ( $\text{\AA}^2$ ) |
|------|-------------|---------------------|------------------|-----------------------|---------------------------------------|
| N57  | G           | N/A                 | N/A              | 97                    | N/A                                   |
| N94  | H           | N/A                 | N/A              | 5                     | N/A                                   |
| N253 | N           | Surface exposed     | Not assigned     | 9                     | 41                                    |
| N254 | H           | Surface exposed     | Not assigned     | 2                     | 50                                    |
| N270 | D           | Surface exposed     | HVR I            | 11                    | 65                                    |
| N304 | N           | Buried              | Alpha helix      | 23                    | 35                                    |
| N329 | G           | Surface exposed     | HVR II           | 94                    | 89                                    |
| N409 | N           | Buried              | Not assigned     | 9                     | 36                                    |
| N452 | G           | Surface exposed     | HVR IV           | 98                    | 64                                    |
| N477 | Y           | Buried              | Not assigned     | 2                     | 33                                    |
| N512 | G           | Surface exposed     | HVR V            | 89                    | 48                                    |
| N515 | S           | Surface exposed     | HVR V            | 3                     | 47                                    |
| N651 | T           | Buried              | HI loop          | 1                     | 38                                    |
| N663 | K           | Surface exposed     | HI loop          | 4                     | 49                                    |
| N668 | S           | Surface exposed     | HI loop          | 13                    | 52                                    |
| N704 | Y           | Surface exposed     | HVR IX           | 5                     | 68                                    |
| N709 | N           | Surface exposed     | HVR IX           | 5                     | 55                                    |

Table S2. Extent of deamidation observed for diverse serotypes

| serotype | vector preps analyzed | Average % sequence Coverage by MS | # of NGs | average NG % deamidation | # of non NG sites observed deamidated | average non-NG % deamidation |
|----------|-----------------------|-----------------------------------|----------|--------------------------|---------------------------------------|------------------------------|
| AAV1     | 3                     | 91.4                              | 4        | 95.6                     | 19                                    | 12.9                         |
| AAV3B    | 1                     | 89.8                              | 4        | 97.0                     | 9                                     | 9.4                          |
| AAV4     | 3                     | 84.7                              | 4        | 96.2                     | 15                                    | 15.3                         |
| AAV5     | 1                     | 88.7                              | 3        | 88.7                     | 11                                    | 15.3                         |
| AAV7     | 1                     | 90.9                              | 4        | 92.1                     | 9                                     | 13                           |
| AAV8     | 21                    | 93.4                              | 5        | 90.5                     | 37                                    | 7.4                          |
| AAV9     | 7                     | 90.2                              | 4        | 95.5                     | 26                                    | 5.3                          |
| rh32.33  | 1                     | 100                               | 3        | 97.4                     | 14                                    | 16.2                         |

## Supplemental Methods

### *Mass spectrometry*

We performed mass spectrometry analysis of samples as described in the main text. For 18O-water experiments, the capsid sample was first buffer exchanged into 100 mM ammonium bicarbonate prepared in 18O-water using Zeba spin desalting columns (Thermo Scientific, Rockford, IL). To ensure complete removal of the water in the sample, we performed the buffer exchange twice. We prepared stock solutions of 1M DTT and 1M IAM in 18O-water. We followed the same denaturation, alkylation, and digestion steps as above with 18O-water reagents and buffers.

Secondary analysis of raw mass spectrometry was performed at the University of Maryland, Baltimore County using the following method. Peaks Studio v5.3 software (Bioinformatics Solutions Inc.) was used for all mass spectrometry analysis. Data refinement of the raw data files was performed with the following parameters: a precursor m/z tolerance of  $\leq 10$ ppm, and precursor charge state with a minimum of 2, maximum of 4. *De novo* sequencing of the input spectrum was performed using the Peaks algorithm with a precursor ion error tolerance of 10ppm and product ion error tolerances of 0.1Da. The digestion enzyme was set as trypsin, the variable modifications were oxidation, phosphorylation, and deamidation, and the fixed modification was carbamidomethylation of cysteine.

### **Primer sequences for AAV8 mutants**

| sequence                               | description                                   |
|----------------------------------------|-----------------------------------------------|
| CGACAACCGGGCAAACcagAATAGCAACTTTGCCTGG  | QC mutagenic primers to change AAV8 N499 to Q |
| CCAGGCAAAGTTGCTATTCTGGTTTTGCCCGTTGTTCG | QC mutagenic primers to change AAV8 N499 to Q |
| GACAACCGGGCAAACgacAATAGCAACTTTGCCTG    | QC mutagenic primers to change AAV8 N499 to D |
| CAGGCAAAGTTGCTATTGTCTGTTTTGCCCGTTGTTC  | QC mutagenic primers to change AAV8 N499 to D |
| GGAGGCACGGCAcagACGCAGACTCTGGG          | qc mutagenic primers to change AAV8 N459 to Q |
| CCCAGAGTCTGCGTCTGTGCCGTGCCTCC          | qc mutagenic primers to change AAV8 N459 to Q |
| CAGGAGGCACGGCAgatACGCAGACTCTGG         | qc mutagenic primers to change AAV8 N459 to D |
| CCAGAGTCTGCGTATCTGCCGTGCCTCCTG         | qc mutagenic primers to change AAV8 N459 to D |
| ctcctcccgatgtcggcttgagatttc            | AAV8 NA263 F                                  |
| gcaaatctccaacgcgacatcgggaggag          | AAV8 NA263 R                                  |
| cccacggcctgactagcgttggtgattg           | AAV8 NA385 F                                  |
| taacctcaacaacgtagtcaggcgtggg           | AAV8 NA385 R                                  |

|                                                |                          |
|------------------------------------------------|--------------------------|
| ggattagccaatgaatttcttgattcagatggtatttggcc      | AAV8 NA514 F             |
| ggaccaaataccatctgaatgcaagaaattcattggctaacc     | AAV8 NA514 R             |
| ttgccaaaaatcaggatcgcttactgggaaaaaacg           | AAV8 NA540 F             |
| cgttttttccagtaacgcgactcctgatttttggcaaa         | AAV8 NA540 R             |
| ggacccttcaacgcactcgacaagggg                    | AAV8 NA57 F              |
| ccccttgcgagtgcttgaagggctc                      | AAV8 NA57 R              |
| tggctctcccgatgctgttggagatttgcctg               | AAV8 NS263 F             |
| caagcaaatctcaacagcacatcgaggaggacca             | AAV8 NS263 R             |
| cccacggcctgactactgttgttggagttagg               | AAV8 NS385 F             |
| cctaactcaacaacagtagtcaggccgtggg                | AAV8 NS385 R             |
| ttagccaatgaatttctgattcagatggtatttggcccagcag    | AAV8 NS514 F             |
| ctgctgggacaaaataccatctgaatagcagaaattcattggctaa | AAV8 NS514 R             |
| ttgtttccaaaaatcaggatgctgttactgggaaaaaacgctc    | AAV8 NS540 F             |
| gagcgttttttccagtaacagcatcctgatttttggcaaaaa     | AAV8 NS540 R             |
| ctcccccttgcgaggctgttgaagggctcgag               | AAV8 NS57 F              |
| ctcggaccctcaacagcctcgacaagggggag               | AAV8 NS57 R              |
| cagcgactcatcaacGACaactggggattccg               | QC primer for AAV8 N305D |
| ggaggcacggcaGATacgcagactctgg                   | QC primer for AAV8 N459D |
| gacaaccgggcaaaacGACaatagcaactttgcctg           | QC primer for AAV8 N499D |
| ccatctgaatggaagaGATcattggctaactcctggcatc       | QC primer for AAV8 N517D |
| cgaagcccaaagccGACcagcaaaagcagg                 | QC primer for AAV8 N35D  |
| gtacctgcggtatGACcagccgacgcc                    | QC primer for AAV8 N94D  |
| gatgctgagaaccggcGACaactccagtttacttac           | QC primer for AAV8 N410D |
| cagactctgggcttcagcGATggtgggctaatacaatg         | QC primer for AAV8 Q467D |
| ccaatcaggcaaaagGACtgctgccaggac                 | QC primer for AAV8 N479D |
| cacggacggcGACttccaccgtctc                      | QC primer for AAV8 N630D |
| gatcctgatcaagGACcagcctgtacctg                  | QC primer for AAV8 N653D |
| gtacctggacccttcAGggactcgacaaggg                | QC primer for AAV8 N57Q  |
| ctacaagcaaatctccCAGggacatcgggaggagc            | QC primer for AAV8 N263Q |
| gctacctaactcaacCAGgtagtcaggccgtgg              | QC primer for AAV8 N385Q |
| gctgggacaaaataccatctgCAGggaagaattcattggc       | QC primer for AAV8 N514Q |
| ggagcgttttttccagtCAGgggatcctgatttttggc         | QC primer for AAV8 N540Q |
| cggaatcccagttgtctgtgatgagtcgctg                | QC primer for AAV8 N305D |
| ccagagtctgcgtatctgcctgcctcc                    | QC primer for AAV8 N459D |
| caggcaaagttgctattgctgttttcccgggttgc            | QC primer for AAV8 N499D |
| gatgccaggattagccaatgaatcttctccattcagatgg       | QC primer for AAV8 N517D |
| cctgcttttgcgtgctggcttgggcttcg                  | QC primer for AAV8 N35D  |
| ggcgtcggcgtgtcataccgcaggtac                    | QC primer for AAV8 N94D  |
| gtaagtaaaactggaagttgctccggttctcagcatc          | QC primer for AAV8 N410D |
| cattgtattaggcccaccatcgtgaagcccagatctg          | QC primer for AAV8 Q467D |
| gtcctggcagccagtcttgcctgattgg                   | QC primer for AAV8 N479D |
| gagacgggtggaagtcgccgtccgtg                     | QC primer for AAV8 N630D |
| cgcaggtacaggcgtctctgatcaggatc                  | QC primer for AAV8 N653D |

gcagcgactcatcaacGACaactggggattccggc  
GCCGGAATCCCCAGTTGTCGTTGATGAGTCGCTGC  
cagcgactcatcaacGACaactggggattccggc  
GCCGGAATCCCCAGTTGTCGTTGATGAGTCGCTG  
gcgactcatcaacGACaactggggattccg  
CGGAATCCCCAGTTGTCGTTGATGAGTCGC  
ctctgggcttcagcGAAGgtggcctaatac  
GTATTAGGCCACCTTCGCTGAAGCCCAGAG  
cctcggacccttcGACggactcgacaagg  
tacaagcaaatctccGACgggacatcgggaggag  
ctacctaactcaacGACggtagtcaggccgtg  
ctgggacaaaataccatctgGATggaagaaattcattggctaac  
gagcgtttttccagtcGACgggatcctgattttggc  
ccttgtcagtcctcgaagggtccgagg  
ctcctccgatgtcccgtcggagattgcttgta  
cacggcctgactaccgtcgttgagtgtagtag  
gattagccaatgaattcttccatccagatggtatttggcccag  
gccaaaaatcaggatcccgtcactgggaaaaaacgctc

alternative longer primer to make AAV8 N305D by qc mutagenesis  
alternative longer primer to make AAV8 N305D by qc mutagenesis  
alternative longer primer to make AAV8 N305D by qc mutagenesis  
alternative longer primer to make AAV8 N305D by qc mutagenesis  
alternative shorter primer to make AAV8 N305D by qc mutagenesis  
alternative shorter primer to make AAV8 N305D by qc mutagenesis  
mutagenic QC primer to make aav8 Q467E  
mutagenic QC primer to make aav8 Q467E  
QC primer for AAV8 N57D  
QC primer for AAV8 N263D  
QC primer for AAV8 N385D  
QC primer for AAV8 N514D  
QC primer for AAV8 N540D  
QC primer for AAV8 N57D  
QC primer for AAV8 N263D  
QC primer for AAV8 N385D  
QC primer for AAV8 N514D  
QC primer for AAV8 N540D
